# Supplementary material for: Functional correlates of cognitive dysfunction in clinically isolated syndromes
Source: PubMed Central journal article supplement (PMC6636738; doi:10.1371/journal.pone.0219590), 2019-07-17
Supplement: pone.0219590.s001.pdf [file pone.0219590.s001.pdf]

**SI Table.** Ocular motor measures (pro- and anti-saccade) did not differ significantly between controls, CIS patients with a history of optic neuritis (ON) and CIS patients without a history of ON.

|                              | <i>Healthy control<br/>(n = 17)</i> | <i>CIS with a history<br/>of ON<br/>(n = 10)</i> | <i>CIS without a<br/>history of ON<br/>(n = 8)</i> |
|------------------------------|-------------------------------------|--------------------------------------------------|----------------------------------------------------|
| <b><i>Prosaccade</i></b>     |                                     |                                                  |                                                    |
| <i>Latency (ms)</i>          | 251.8 ± 57.3                        | 279.1 ± 60.5                                     | 245.7 ± 37.6                                       |
| <i>Directional error (%)</i> | 2.6 ± 3.1                           | 4.5 ± 3.5                                        | 3.3 ± 3.4                                          |
| <b><i>Antisaccade</i></b>    |                                     |                                                  |                                                    |
| <i>Latency (ms)</i>          | 330.3 ± 61.3                        | 341.5 ± 49.2                                     | 318.0 ± 63.7                                       |
| <i>Directional error (%)</i> | 5.9 ± 4.3                           | 7.2 ± 7.2                                        | 5.4 ± 5.4                                          |
