# Supplementary material for: Functional correlates of cognitive dysfunction in clinically isolated syndromes
Source: PubMed Central journal article supplement (PMC6636738; doi:10.1371/journal.pone.0219590), 2019-07-17
Supplement: pone.0219590.s002.pdf [file pone.0219590.s002.pdf]

**S2 Table. Association between functional activation and brain injury in patients.** WM = white matter; GM = grey matter. \* = survived multiple comparison using FDR

|                                    | $\beta$      | $p$           |
|------------------------------------|--------------|---------------|
| <b>AS&gt;PS network activation</b> |              |               |
| Lesion volume                      | <b>-0.74</b> | <b>0.001*</b> |
| Ventricle fraction                 | -0.21        | 0.51          |
| Corpus callosum fraction           | <b>0.52</b>  | <b>0.042</b>  |
| Cerebellum fraction                | 0.14         | 0.64          |
| Cortical WM fraction               | 0.36         | 0.17          |
| Cortical GM fraction               | -0.05        | 0.90          |
| Subcortical GM fraction            | 0.49         | 0.11          |
| <b>AS&lt;PS network activation</b> |              |               |
| Lesion volume                      | -0.32        | 0.15          |
| Ventricle fraction                 | -0.32        | 0.26          |
| Corpus callosum fraction           | <b>0.53</b>  | <b>0.014</b>  |
| Cerebellum fraction                | -0.16        | 0.55          |
| Cortical WM fraction               | 0.41         | 0.064         |
| Cortical GM fraction               | -0.04        | 0.90          |
| Subcortical GM fraction            | 0.39         | 0.15          |
