# Supplementary material for: Functional correlates of cognitive dysfunction in clinically isolated syndromes
Source: PubMed Central journal article supplement (PMC6636738; doi:10.1371/journal.pone.0219590), 2019-07-17
Supplement: pone.0219590.s003.pdf [file pone.0219590.s003.pdf]

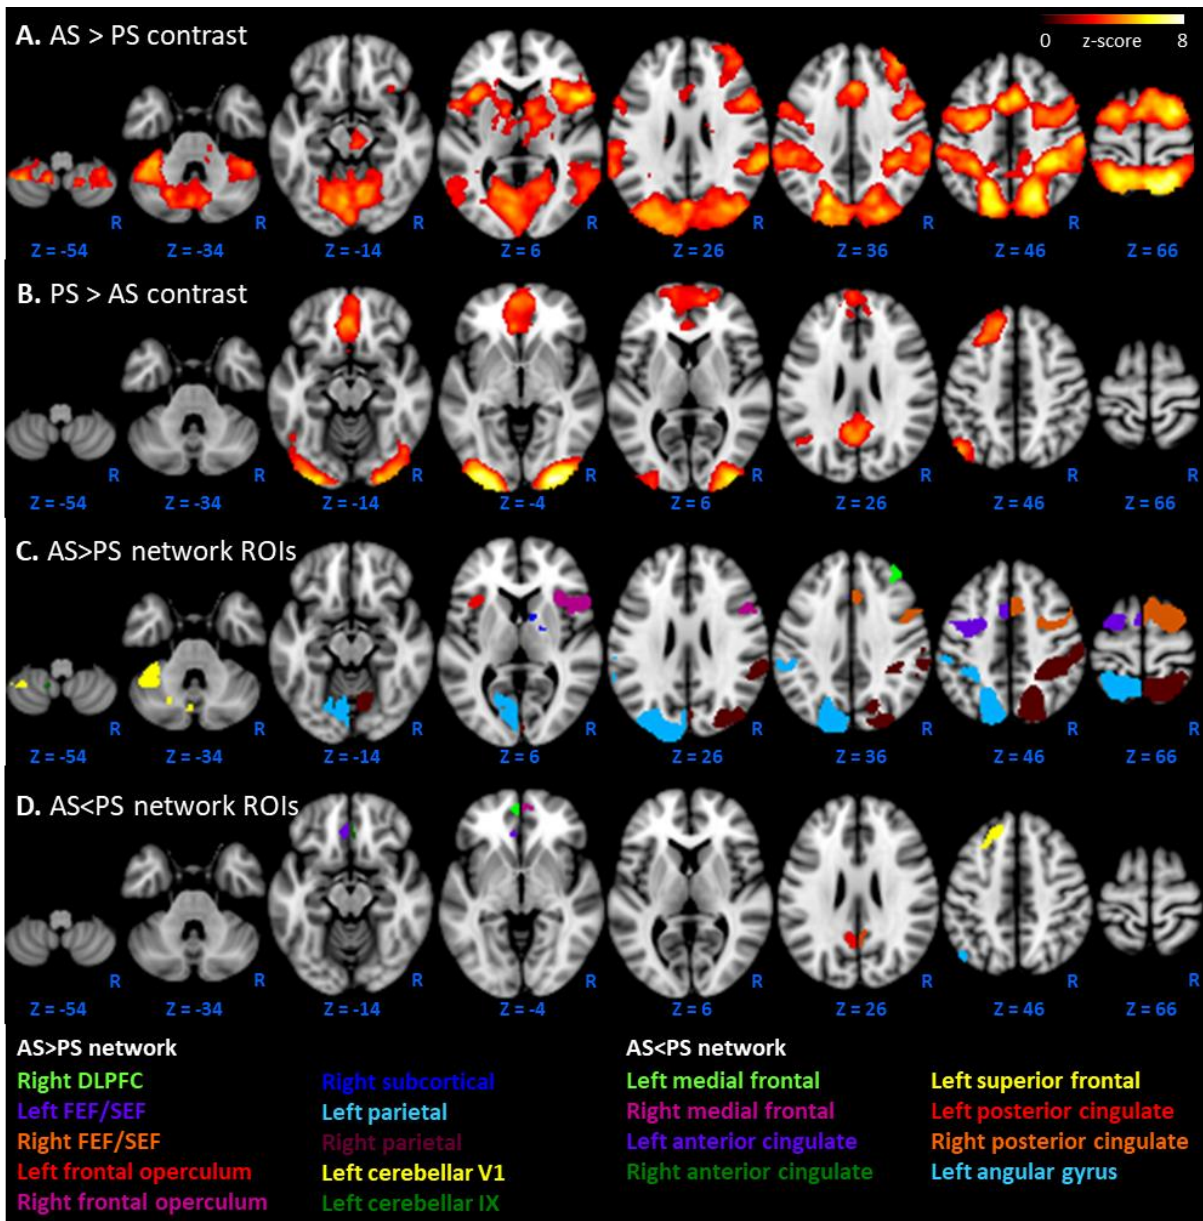

**S1 Fig. Regions of interest derived from the switch ocular motor task.** The anti-saccade (AS) vs prosaccade (PS) contrasts were used to derive regions of interests (ROI). Significant regions of the main effect of **A. AS > PS network** and **B. AS < PS network** across both cohorts were parcellated into regions. DLPFC = dorsal lateral prefrontal cortex, FEF = frontal eye fields, SEF = supplementary eye fields,
