# Supplementary material for: Functional correlates of cognitive dysfunction in clinically isolated syndromes
Source: PubMed Central journal article supplement (PMC6636738; doi:10.1371/journal.pone.0219590), 2019-07-17
Supplement: pone.0219590.s004.pdf [file pone.0219590.s004.pdf]

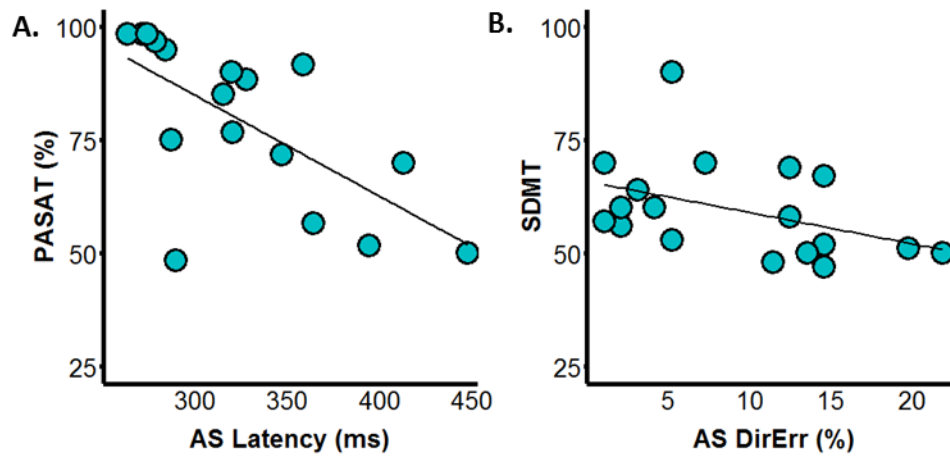

**S2 Fig.** Scatterplots show the relationships between anti-saccade (AS) and neuropsychological measures in patients. AS latency correlated with paced auditory serial addition test (PASAT) scores, and AS directional error rate correlated with symbol digit modalities test (SDMT) scores
