# Supplementary material for: Functional correlates of cognitive dysfunction in clinically isolated syndromes
Source: PubMed Central journal article supplement (PMC6636738; doi:10.1371/journal.pone.0219590), 2019-07-17
Supplement: pone.0219590.s005.pdf [file pone.0219590.s005.pdf]

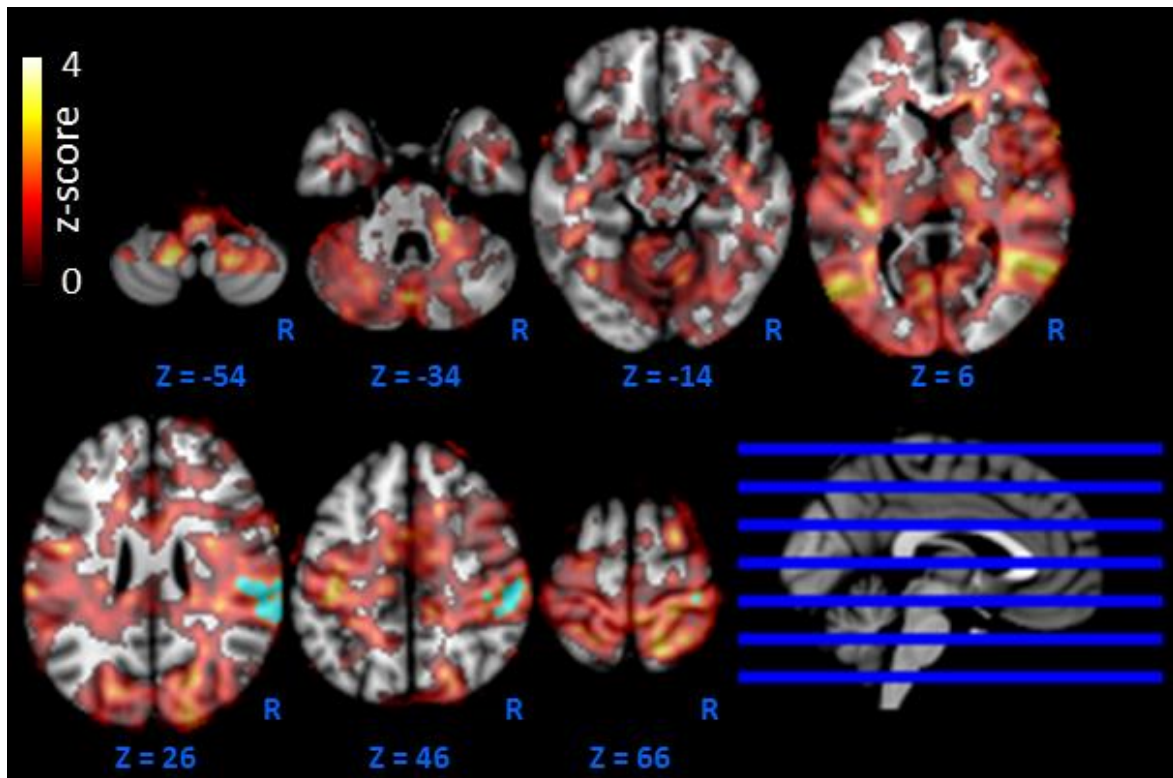

*S3 Fig. Effect size of functional activation for CIS>healthy controls during antisaccade (AS)>prosaccade (PS) contrast. Z-scores for CIS>healthy control subjects overlapped over significant group-specific region (blue) to show widespread functional differences between patients and controls*
